# Supplementary material for: Adenosine-mediated immune responses in inflammatory bowel disease
Source: PubMed Central journal article supplement (PMC11345147; doi:10.3389/fcell.2024.1429736), 2024-08-12
Supplement: Table1.pdf [file Table1.pdf]

**Supplementary Table 1. Adenosine receptor expression and activation effects.**

| Adenosine receptor     | Immune cell population | Species/Experimental settings                                                                                                                                           | Effect of receptor activation (otherwise differently specified)                                                                                                                                                             | References                                                    |
|------------------------|------------------------|-------------------------------------------------------------------------------------------------------------------------------------------------------------------------|-----------------------------------------------------------------------------------------------------------------------------------------------------------------------------------------------------------------------------|---------------------------------------------------------------|
| <b>A<sub>1</sub>R</b>  | Dendritic cells        | Human plasmacytoid dendritic cells (PDCs)                                                                                                                               | Cell recruitment to infection site                                                                                                                                                                                          | Schnurr et al., 2004                                          |
|                        |                        | Murine resting DCs                                                                                                                                                      | Suppression of vesicular MHC-I cross-presentation                                                                                                                                                                           | Chen et al., 2008                                             |
|                        | Neutrophils            | Human neutrophils                                                                                                                                                       | Favors cell adherence to endothelium, chemotaxis towards the inflammation site and FcγR function                                                                                                                            | Salmon et al., 1990                                           |
|                        |                        | Human polymorphonuclear leukocytes                                                                                                                                      | Exposure to pro-inflammatory conditions limits A <sub>2A</sub> R expression by boosting miRNA-214, miRNA-15 and miRNA-16                                                                                                    | Heyn et al., 2012                                             |
|                        |                        | LPS-induced acute lung injury in mouse                                                                                                                                  | Downregulation of neutrophil trafficking and responses, leading to a beneficial effect                                                                                                                                      | Ngamsri et al., 2010                                          |
|                        | Th2-cells              | A <sub>1</sub> R removal in ADA deficient mice                                                                                                                          | Enhanced pulmonary inflammation due to increased expression of the Th2 cytokines IL-4 and IL-13 in the lung                                                                                                                 | Sun et al., 2005                                              |
| <b>A<sub>2A</sub>R</b> | Macrophages            | Murine macrophage cell line and peritoneal macrophages                                                                                                                  | Decrease in LPS-induced pro-inflammatory response, upregulation of M2 markers                                                                                                                                               | Sadatpour et al., 2022; Devi et al., 2023                     |
|                        | Neutrophils            | Sepsis patients or murine sepsis models                                                                                                                                 | A <sub>2A</sub> R expression and ligand affinity are reduced, failing to mediate adenosine immunosuppressive activity. A <sub>2A</sub> R stimulation fails to suppress cell death, slows aging, and promotes a N2 phenotype | Kreth et al., 2009; Lovaszi et al., 2022                      |
|                        |                        | Murine model of ischemia reperfusion injury (IRI)                                                                                                                       | Limitation of inflammation and improvement of animal condition                                                                                                                                                              | Sharma et al., 2010                                           |
|                        | Dendritic cells        | Human PDCs                                                                                                                                                              | Limitation of pro-inflammatory cytokines release at infection site                                                                                                                                                          | Schnurr et al., 2004                                          |
|                        |                        | Human immature DCs (iDCs) and monocyte-derived DCs (mDCs)                                                                                                               | Enhanced macropinocytotic activity and increased membrane expression of major histocompatibility complex class-I (MHC-I) and class-II (MHC-II) molecules                                                                    | Panther et al., 2003                                          |
|                        |                        | Murine DCs in IRI model                                                                                                                                                 | Limited maturation and inflammatory responses of re-oxygenated murine DCs after hypoxic exposure                                                                                                                            | Liu et al., 2015                                              |
|                        | NK/NK T-cells          | Human and murine invariant NK-cells (iNKT); human and murine models of sickle cell disease (SDC). NK-cells in murine models of IRI and Concanavalin-A induced hepatitis | Beneficial effect leading to decreased iNKT-cell activation                                                                                                                                                                 | Field et al., 2013; Lappas et al., 2006; Wallace et al., 2010 |
|                        |                        | <i>Ex vivo</i> activated human iNKT-cells                                                                                                                               | A <sub>2A</sub> R upregulated upon cell activation                                                                                                                                                                          | Yu et al., 2018                                               |
|                        |                        | Human and murine NK-cells                                                                                                                                               | Anti-inflammatory cytokines production in mouse; inhibition of NK-cell differentiation through blockade of IL-15 signaling in humans                                                                                        | Kang et al., 2023; Nowak et al., 2010                         |
|                        | Th1/Tc1-cells          | Murine model of nonalcoholic steatohepatitis                                                                                                                            | Beneficial effect, reduced Th17-cell expansion and JNK-dependent lipotoxicity                                                                                                                                               | Alchera et al., 2017                                          |
|                        |                        | Murine models of <i>Leishmania infantum</i>                                                                                                                             | Limited development of Th1 adaptive immunity                                                                                                                                                                                | Lima et al., 2017                                             |
|                        | Th17-cells             | Asthma patients, murine models of OVA-induced lung inflammation, autoimmune liver disease patients                                                                      | Immunosuppressive role, disrupted in disease                                                                                                                                                                                | Wang et al., 2018; Liberal et al., 2016                       |
|                        | Treg-cells             | Human and murine Treg-cells                                                                                                                                             | Autocrine promotion of adenosine-mediated regulatory phenotype                                                                                                                                                              | Bao et al., 2016                                              |
|                        |                        | Scurfy mouse model                                                                                                                                                      | Effective counteraction of Treg deficiency that drives autoimmunity                                                                                                                                                         | He et al., 2017                                               |
|                        |                        | Murine IRI model                                                                                                                                                        | A <sub>2A</sub> R deficient Tregs fail to confer protection during inflammation                                                                                                                                             | Kinsey et al., 2012                                           |
|                        |                        | Ova-induced lung inflammation                                                                                                                                           | Enhanced Treg responses                                                                                                                                                                                                     | Lima et al., 2017                                             |

|                        |                               |                                                                                                                                 |                                                                                                                              |                                                                   |
|------------------------|-------------------------------|---------------------------------------------------------------------------------------------------------------------------------|------------------------------------------------------------------------------------------------------------------------------|-------------------------------------------------------------------|
|                        |                               | Murine model of experimental autoimmune uveoretinitis; cells from uveitis patients                                              | Treg migration to the site of inflammation <i>in vivo</i> or <i>in vitro</i>                                                 | Zhao et al., 2010                                                 |
|                        |                               | Murine Tregs                                                                                                                    | CD4 <sup>+</sup> CD25 <sup>high</sup> FoxP3 <sup>+</sup> Treg expansion                                                      | Ohta et al., 2012                                                 |
|                        |                               | Human CD4 <sup>+</sup> and CD8 <sup>+</sup> T-cells                                                                             | During T-cell activation, A <sub>2A</sub> R signaling inhibits cytotoxicity and cytokine-release activity                    | Ohta et al., 2009                                                 |
|                        | Group 2 innate lymphoid cells | Murine, <i>in vitro</i>                                                                                                         | Suppression of IL-13 and IL-15 release                                                                                       | Csoka et al., 2018                                                |
| <b>A<sub>2B</sub>R</b> | Myeloid cells                 | Mouse peritoneal macrophages                                                                                                    | IL-10 and IL-6 production, suppression of TNF- $\alpha$ release                                                              | Rhyzov et al., 2008 ; Nemeth et al., 2005 ; Kreckler et al., 2006 |
|                        |                               | Cockroach allergen model of murine asthma-like pulmonary inflammation                                                           | Systemic receptor deletion in myeloid cells is beneficial due to decrease in Th2 airway responses                            | Belikoff et al., 2012                                             |
|                        | Dendritic cells               | Murine bone marrow-derived DCs, murine autoimmune encephalomyelitis model                                                       | Differentiation into a CD11c(+) Gr-1(+), IL-6 releasing subset, that promotes Th17-cell differentiation and immune responses | Wilson et al., 2011; Wei et al., 2013                             |
|                        | Neutrophils                   | <i>In vitro</i> and <i>in vivo</i> model of acute kidney injury and murine models of peritonitis and peritonitis-related sepsis | Inhibition of TNF- $\alpha$ release                                                                                          | Grenz et al., 2012; Ngamsri et al., 2020                          |
|                        | Mast cells                    | Human mast cells                                                                                                                | Release of Th2 cytokines                                                                                                     | Rhyzov et al., 2004                                               |
|                        | Th17-cells                    | <i>Trichinella spiralis</i> infection - murine model                                                                            | Receptor upregulation accelerates post-infection IBD by promoting Th17-cell differentiation                                  | Dong et al., 2022                                                 |
|                        | Treg-cells                    | Murine heterotopic tracheal model of bronchiolitis obliterans                                                                   | Inhibition of Treg-cell infiltration at the inflammatory site                                                                | Zhao et al., 2010                                                 |
|                        | Group 2 innate lymphoid cells | Murine, <i>in vitro</i>                                                                                                         | IL-15 releases                                                                                                               | Csoka et al., 2018                                                |
| <b>A<sub>3</sub>R</b>  | Neutrophils                   | Human and murine neutrophils                                                                                                    | Cell migration to the lungs                                                                                                  | Inoue et al., 2008; Butler et al., 2012                           |
|                        | Mast cells                    | Murine models of airway inflammation                                                                                            | Modulation of adenosine responses                                                                                            | Tilley et al., 2003                                               |
